# Supplementary material for: Deriving a Mutation Index of Carcinogenicity Using Protein Structure and Protein Interfaces
Source: PLoS One. 2014 Jan 15;9(1):e84598. doi: 10.1371/journal.pone.0084598 (PMC3893166; doi:10.1371/journal.pone.0084598)
Supplement: Table S5 — Cancer functions for proteins containing mutations that were predicted as drivers by InCa only. (XLS) [file pone.0084598.s024.xls]

## Sheet: InCa
UniProt/SwissProt Accession	Gene Name	Cancer-related function	HGNC symbol	PMIDs	Comments
O00170	aryl hydrocarbon receptor interacting protein	Mutated in pituitary tumours	AIP	17609395
O00522	KRIT1, ankyrin repeat containing	Ras-GTPase and cancer-associated	KRIT1	9285558
O14976	cyclin G associated kinase	Well-characterised cancer gene	GAK
O15066	kinesin family member 3B	Part of mitotic apparatus	KIF3B	16298999
O15119	T-box 3	Overexpressed in breast cancer	TBX3	18245468
O15123	angiopoietin 2	High expression promotes tumour angiogenesis	ANGPT2	23149917
O15350	tumor protein p73	Well-characterised cancer gene	TP73
O60218	aldo-keto reductase family 1, member B10 (aldose reductase); aldo-keto reductase family 1, member B10-like	Oncogene	AKR1B10	17209433
O60547	GDP-mannose 4,6-dehydratase	Deficiency inhibits apoptosis	GMDS	22027835
O60921	HUS1 checkpoint homolog (S. pombe)	Cell cycle protein	HUS1
O60930	ribonuclease H1	Protects DNA; involved in cell death	RNASEH1
O60942	RNA guanylyltransferase and 5'-phosphatase		RNGTT
O75351	vacuolar protein sorting 4 homolog B (S. cerevisiae)	Promotes tumor progression	VPS4B	22252323
O75884	retinoblastoma binding protein 9	Overexpressed in tumors	RBBP9
O76036	natural cytotoxicity triggering receptor 1	Required for meloma cell recognition	NCR1	15328155
O95045	uridine phosphorylase 2		UPP2
O95271	tankyrase, TRF1-interacting ankyrin-related ADP-ribose polymerase	Well-characterised cancer gene	TNKS
P00450	ceruloplasmin (ferroxidase)	Level increased in cancer patients	CP	12708132
P00492	hypoxanthine phosphoribosyltransferase 1	Has a weak mutagenic effect at HPRT gene locus in human promyelocytic leukaemia HL-60 and NB4 cell lines	HPRT1	18407966
P00734	coagulation factor II (thrombin)	Often gives rise to cancer-associated thrombosis	F2	17663729
P00740	coagulation factor IX	Coagulation factors control thrombosis, which contributes to cancer morbidity	F9	23585459
P00797	renin	Aberrant expression in leukemia	REN
P00915	carbonic anhydrase I	Downregulated in neoplastic colorectal mucosa	CA1
P00918	carbonic anhydrase II	Pdcd4 inhibits growth of tumor cells by suppression of carbonic anhydrase type II	CA2	15062553
P01008	serpin peptidase inhibitor, clade C (antithrombin), member 1	Differentially expressed in prostate cancer	SERPINC1	12466122
P01009	serpin peptidase inhibitor, clade A (alpha-1 antiproteinase, antitrypsin), member 1	Marker of insulinomas	SERPINA1
P01236	prolactin	Stimulates cell proliferation	PRL
P01375	tumor necrosis factor (TNF superfamily, member 2)	Well-characterised cancer gene	TNF
P01892	major histocompatibility complex, class I, A	Serum levels identify poor prognosis	HLA-A	18361931
P02461	collagen, type III, alpha 1	Stimulates cell proliferation	COL3A1	11973338
P02741	C-reactive protein, pentraxin-related	Levels associated with poor survival outcome in some patients	CRP	18005189
P02753	retinol binding protein 4, plasma	Associated with cancer and may promote tumourogenesis	RBP4	2777132
P02766	transthyretin	Upregulated in brain cancer	TTR	18257091
P03951	coagulation factor XI	CFXa, a related gene, inhibits cancer cell migration via LIMK1	F11
P04745	amylase, alpha 1A (salivary); amylase, alpha 1B (salivary); amylase, alpha 1C (salivary)	Expressed in lung cancers	AMY1A	2835158
P04746	amylase, alpha 2A (pancreatic)	Possibly silenced in gastric carcinoma	AMY2A	20428766
P05091	aldehyde dehydrogenase 2 family (mitochondrial)	Interaction between ALDH2 and ADH2 polymorphisms may have a role in colorectal cancer	ALDH2	16332725
P05121	serpin peptidase inhibitor, clade E (nexin, plasminogen activator inhibitor type 1), member 1	Levels high in cervical cancer	SERPINE1	23111469
P05455	Sjogren syndrome antigen B (autoantigen La)	Potential cooperative relationship between Dicer and La/SSB in human breast cancer	SSB	23129761
P06733	enolase 1, (alpha)	Tumor suppressor	ENO1	16359544
P07148	fatty acid binding protein 1, liver	Marker of gastric cancer	FABP1	22172348
P07195	lactate dehydrogenase B	Part of risk-gene signature for blastomas	LDHB	18593994
P07288	kallikrein-related peptidase 3	Differentially regulated in breast cancer	KLK3	12124798
P07316	crystallin, gamma B	Other crystallins have been associated with oral cancer	CRYGB	21915251
P07711	cathepsin L1	Expressed differentially in tumours	CTSL1
P08235	nuclear receptor subfamily 3, group C, member 2	Mediates cancer cell adhesion in BC	NR3C2	14617569
P08559	pyruvate dehydrogenase (lipoamide) alpha 1	Inhibited in some cancers	PDHA1	18541534
P08758	annexin A5	Mediates apoptosis	ANXA5
P09012	small nuclear ribonucleoprotein polypeptide A	Related small nuclear ribonucleoprotein polypeptides interact with DDX20, which controls miRNA tumoriginicity	SNRPA	22445758
P09038	fibroblast growth factor 2 (basic)	Controls proliferation	FGF2
P10144	granzyme B (granzyme 2, cytotoxic T-lymphocyte-associated serine esterase 1)	Induces apoptosis	GZMB	12648453
P11245	N-acetyltransferase 2 (arylamine N-acetyltransferase)	Associated with several cancers	NAT2
P11766	alcohol dehydrogenase 5 (class III), chi polypeptide, pseudogene 4; alcohol dehydrogenase 5 (class III), chi polypeptide	Levels high in pancreatic cancer	ADH5	18095160
P12004	proliferating cell nuclear antigen	Drives tumor growth in prostate cancers	PCNA	21220489
P12259	coagulation factor V (proaccelerin, labile factor)	Associated with colorectal cancer	F5	21422408
P13726	coagulation factor III (thromboplastin, tissue factor)	Overexpressed in various cancers	F3
P14324	farnesyl diphosphate synthase (farnesyl pyrophosphate synthetase, dimethylallyltranstransferase, geranyltranstransferase)	Has a role in colon cancer proliferation	FDPS	15713990
P14920	D-amino-acid oxidase	Potential target in gliomas	DAO	21921941
P15104	glutamate-ammonia ligase (glutamine synthetase)	Required for proliferation of fibroblasts	GLUL	18662667
P15121	aldo-keto reductase family 1, member B1 (aldose reductase)	Expression decreased in adrenocortical cancer	AKR1B1	15181092
P15509	colony stimulating factor 2 receptor, alpha, low-affinity (granulocyte-macrophage)	Sustains cell proliferation in breast cancers	CSF2RA	22096574
P16157	ankyrin 1, erythrocytic	Tumor suppressor association	ANK1
P16410	cytotoxic T-lymphocyte-associated protein 4	Direct target of Wnt/beta-catenin signaling and is expressed in human melanoma tumors	CTLA4	18563180
P16471	prolactin receptor	Expression stimulated in BC cells	PRLR	12477494
P16581	selectin E	mediates the adhesion of tumor cells to endothelial cells	SELE	18028011
P17050	N-acetylgalactosaminidase, alpha-	Component of immunosuppression in cancer	NAGA
P17066	heat shock 70kDa protein 7 (HSP70B); heat shock 70kDa protein 6 (HSP70B')	Hsps are overexpressed in many cancers	HSPA6	16038406
P19099	cytochrome P450, family 11, subfamily B, polypeptide 2	Expressed in several cancers	CYP11B2
P19793	retinoid X receptor, alpha	Mutations in pituitary cancer	RXRA
P19878	neutrophil cytosolic factor 2	Anti-apoptotic protein	NCF2	23255096
P19971	thymidine phosphorylase	Well-characterised cancer gene	TYMP
P20248	cyclin A2	Well-characterised cancer gene	CCNA2
P20718	granzyme H (cathepsin G-like 2, protein h-CCPX)	Involved in cell death and DNA repair	GZMH
P22087	fibrillarin	A target of MYC oncogene and is redistributed in some cancers	FBL	21435462
P22301	interleukin 10	Immunosuppressive cytokine that favors tumor escape from immune surveillance	IL10	22172723
P23381	tryptophanyl-tRNA synthetase	Angiogenesis activator	WARS
P23677	inositol 1,4,5-trisphosphate 3-kinase A	Cell motility promoter	ITPKA	20022963
P23946	chymase 1, mast cell	Mediator of mast cell activity in basal cell carcinomas	CMA1	17658999
P26368	U2 small nuclear RNA auxiliary factor 2	Associates with DEK, a protein often elevated and mutated in some cancers, and is a component of the splicing machinery	U2AF2	16809543
P26715	killer cell lectin-like receptor subfamily C, member 1	Component of anti-tumor immunity	KLRC1
P27448	MAP/microtubule affinity-regulating kinase 3	MARKs are cancer markers and control cell division	MARK3	21984823
P28845	hydroxysteroid (11-beta) dehydrogenase 1	Regulation of proliferation	HSD11B1	15172126
P28907	CD38 molecule	Plays a role in the progression of B-chronic lymphocytic leukemia	CD38	12368155
P29016	CD1b molecule		CD1B
P30044	peroxiredoxin 5	Target of cancer drugs	PRDX5
P35568	insulin receptor substrate 1	Constitutive IRS-1 activation is a common phenomenon in tumors	IRS1	12414625
P35790	choline kinase alpha	Regulates Ras in cancer cells	CHKA
P35914	3-hydroxymethyl-3-methylglutaryl-Coenzyme A lyase	Expressed in glioblastomas	HMGCL	22865860
P36980	complement factor H-related 2	Marker in bladder cancer	CFHR2	11176376
P38919	eukaryotic translation initiation factor 4A, isoform 3	Inhibits tumor promoter-induced neoplastic transformation	EIF4A3	12482958
P41146	opiate receptor-like 1	Regulates cancer cell growth	OPRL1
P41212	ets variant 6	Well-characterised cancer gene	ETV6
P42126	dodecenoyl-Coenzyme A delta isomerase (3,2 trans-enoyl-Coenzyme A isomerase)	Decreased levels in metastatic breast cancer cells might have impact on the aberrant behavior of cancer cells (see BRENDA ENTRY)	ECI1
P45381	aspartoacylase (Canavan disease)		ASPA
P45452	matrix metallopeptidase 13 (collagenase 3)	Proliferation regulation	MMP13
P48052	carboxypeptidase A2 (pancreatic)		CPA2
P49643	primase, DNA, polypeptide 2 (58kDa)	DNA replication enzyme	PRIM2	17893144
P50120	retinol binding protein 2, cellular	Involved in retinoic acid synthesis and may contribute to glioma formation along the IDH1/IDH2-mutant pathway	RBP2	22945948
P50440	glycine amidinotransferase (L-arginine:glycine amidinotransferase)	Decreased levels in renal cancers	GATM	21556466
P52895	aldo-keto reductase family 1, member C2 (dihydrodiol dehydrogenase 2; bile acid binding protein; 3-alpha hydroxysteroid dehydrogenase, type III)	Differentially expressed in breast cancer	AKR1C2	15212687
P53041	protein phosphatase 5, catalytic subunit	Cell cycle protein	PPP5C	11137038
P54687	branched chain aminotransferase 1, cytosolic	Promotes cell proliferation in nasopharyngeal carcinoma	ITGA1	18074675
P55010	eukaryotic translation initiation factor 5	Recruits mnk1 to phosphorylate eIF4E	BCAT1
P55273	cyclin-dependent kinase inhibitor 2D (p19, inhibits CDK4)	Cell cycle inhibitor	EIF5	15750620
P56524	histone deacetylase 4	Interacts with breast cancer associated transcriptional repressors	HDAC4	17373667
P60568	interleukin 2	Component of anti-tumor immunity	IL2
P61244	MYC associated factor X	Well-characterised cancer gene	WDR5
P62508	estrogen-related receptor gamma	Expressed in some cancers	ESRRG	16681769
P63279	ubiquitin-conjugating enzyme E2I (UBC9 homolog, yeast)	Possible interactor with Smad 4	HIST1H4A
Q02080	LOC729991-MEF2B readthrough transcript; myocyte enhancer factor 2B	Required for cell differentiation and interacts with MAP kinase	MEF2BNB-MEF2B
Q04828	aldo-keto reductase family 1, member C1 (dihydrodiol dehydrogenase 1; 20-alpha (3-alpha)-hydroxysteroid dehydrogenase)	Well-characterised cancer gene	AKR1C1
Q06124	protein tyrosine phosphatase, non-receptor type 11; similar to protein tyrosine phosphatase, non-receptor type 11	Well-characterised cancer gene	PTPN11
Q06520	sulfotransferase family, cytosolic, 2A, dehydroepiandrosterone (DHEA)-preferring, member 1	Down-regulation in hepatocellular carcinoma	SULT2A1	15713538
Q07343	phosphodiesterase 4B, cAMP-specific (phosphodiesterase E4 dunce homolog, Drosophila)	Mediator of apoptosis	PDE4B	11839681
Q07912	tyrosine kinase, non-receptor, 2	Well-characterised cancer gene	TNK2
Q08209	protein phosphatase 3 (formerly 2B), catalytic subunit, alpha isoform	Associated with prostate cancer	PPP3CA
Q12756	kinesin family member 1A	Modulates cell division.	KIF1A
Q12794	hyaluronoglucosaminidase 1	Expression and regulation associated with several cancers	HYAL1
Q13126	methylthioadenosine phosphorylase	Acts as a tumor suppressor in breast cancer	MTAP	12438261
Q13257	MAD2 mitotic arrest deficient-like 1 (yeast)	Cell cycle gene	MAD2L1
Q13309	S-phase kinase-associated protein 2 (p45)	Cell cycle gene	SKP2
Q13322	growth factor receptor-bound protein 10	Well-characterised cancer gene	GRB10
Q13630	tissue specific transplantation antigen P35B	activates cancer cellular phenotypes	TSTA3	22528125
Q14145	kelch-like ECH-associated protein 1	Mutations in breast cancer stop Nrf2 repression	KEAP1	17822677
Q14376	UDP-galactose-4-epimerase		GALE
Q15019	septin 2	Coordinates cytokinesis	SEPT2
Q15485	ficolin (collagen/fibrinogen domain containing lectin) 2 (hucolin)		FCN2
Q15637	splicing factor 1	Splicing factors can affect the genes that regulate tumor growth	SF1	21082031
Q15782	chitinase 3-like 2	Induces cell proliferation	CHI3L2	22211103
Q16539	mitogen-activated protein kinase 14	Well-characterised cancer gene	MAPK14
Q16831	uridine phosphorylase 1	Regulates p53	UPP1
Q5VWZ2	lysophospholipase-like 1		LYPLAL1
Q6B0I6	lysine (K)-specific demethylase 4D	Modifies histones	KDM4D
Q6IMI6	sulfotransferase family, cytosolic, 1C, member 3	Removes metabolic mutagens	SULT1C3	17936463, 11467078
Q8IX03	WW and C2 domain containing 1	Has domains shown to contribute to ER transactivation in breast cancer cells	WWC1	16684779
Q8N0W4	neuroligin 4, X-linked		NLGN4X
Q8N6T7	sirtuin (silent mating type information regulation 2 homolog) 6 (S. cerevisiae)	Sirtuins are regulators of cancer	SIRT6	22363287
Q8NEM0	microcephalin 1	Regulates DNA repair, Checkpoints and apoptosis	MCPH1
Q8NHJ6	leukocyte immunoglobulin-like receptor, subfamily B (with TM and ITIM domains), member 4	Autoimmunity gene	LILRB4	17923119
Q8TEB7	ring finger protein 128	Many ring finger proteins control ubiquitination nad play roles as tumor suppressors	RNF128	21863050
Q8WWP7	GTPase, IMAP family member 1	GIMPS regulate apoptosis	GIMAP1	16088918
Q8WWY3	PRP31 pre-mRNA processing factor 31 homolog (S. cerevisiae)		PRPF31		processing snRRP
Q8WYN0	ATG4 autophagy related 4 homolog A (S. cerevisiae)	Regulates autophagy, which is an important component in cancer pathology	ATG4A	21297227
Q93009	ubiquitin specific peptidase 7 (herpes virus-associated)	Binds p53 and could thereby act as a tumour suppressor	USP7
Q96A58	RAS-like, estrogen-regulated, growth inhibitor	Overexpressed in pituitary adenomas	RERG	21270509
Q96C86	decapping enzyme, scavenger		DCPS		mRNA splicing
Q96E29	MTERF domain containing 1		MTERFD1
Q96HN2	adenosylhomocysteinase-like 2	Downregulation of KIAA0828 is associated with colon/lung carcinomas	AHCYL2
Q96IY4	carboxypeptidase B2 (plasma)	Abnormally cleaves osteopontin in glial tumours	CPB2	23204518
Q9BQA1	WD repeat domain 77	Androgen receptor cofactor and regulates cell proliferation in prostate cancer	WDR77	18356297
Q9BY32	inosine triphosphatase (nucleoside triphosphate pyrophosphatase)	Maintains genome stability	ITPA	22384212
Q9BY41	histone deacetylase 8	Overexpressed in some cancers	HDAC8	19118036
Q9GZT9	egl nine homolog 1 (C. elegans)	PHD2 downregulates HIF-1a and thus also tumorigenesis	EGLN1
Q9H211	chromatin licensing and DNA replication factor 1	Control of cell cycle checkpoints	CDT1
Q9H981	ARP8 actin-related protein 8 homolog (yeast)	Part of chromatin remodeling and modifying complexes	ACTR8
Q9NPF7	interleukin 23, alpha subunit p19	Favors tumor escape from immune surveillance	IL23A	16688182
Q9NR56	muscleblind-like (Drosophila)		MBNL1		Splicing
Q9UBR2	cathepsin Z	Overexpression associated with cell transitions in hepatocellular carcinomas	CTSZ	21966391
Q9UG22	GTPase, IMAP family member 2	Decreased expression may contribute to lung cancer	GIMAP2	18462827
Q9UGN4	CD300a molecule	Posible regulator of immune response in cancer	CD300A	23293083
Q9UH77	kelch-like 3 (Drosophila)	Kelch-like proteins might be implicated in carcinogenesis	KLHL3	15870933
Q9UJ71	CD207 molecule, langerin	Expressed in various cancers	CD207	20715107
Q9UK55	serpin peptidase inhibitor, clade A (alpha-1 antiproteinase, antitrypsin), member 10	Member 1 of gene family is a marker	SERPINA10	17855650
Q9UNN8	protein C receptor, endothelial (EPCR)	Expressed by ovarian cancer cells	PROCR
Q9UPN9	tripartite motif-containing 33	Interacts with SMADs	TRIM33	22196728
Q9Y233	phosphodiesterase 10A	Overexpressed in some cancers	PDE10A	20001559
Q9Y3C8	ubiquitin-fold modifier conjugating enzyme 1	A component of stress-induced apoptosis	UFC1	21494687‎
Q9Y3M8	StAR-related lipid transfer (START) domain containing 13	Poor prognosis in cancer patients with low expression	STARD13
Q9Y6M4	casein kinase 1, gamma 3	Promotes the Turnover of the Mdm2 Oncoprotein	CSNK1G3	20708156
O00214	lectin, galactoside-binding, soluble, 8	mediates cell migration and proliferation	LGALS8	11839721
O00571	DEAD (Asp-Glu-Ala-Asp) box polypeptide 3, X-linked	candidate tumour suppressor	DDX3X	16818630
O14646	chromodomain helicase DNA binding protein 1	altres genomic structure in prostate cancer	CHD1	22139082
O60704	tyrosylprotein sulfotransferase 2	might contribute to nasopharyngeal carcinoma	TPST2	23472069
O75530	embryonic ectoderm development	gives growth advantage of tumour cells in lymph node	EED	23251464
O95714	hect domain and RLD 2	targets BRCA1	HERC2	20631078
O95727	cytotoxic and regulatory T cell molecule	well characterised cancer gene	CRTAM	15811952
P02787	transferrin	cancer maker	TF	14965443
P04040	catalase	accelerates degradation of p53	CAT	12468545
P04156	prion protein	contribute to cancer progression	PRNP	22138778
P05155	serpin peptidase inhibitor, clade G (C1 inhibitor), member 1		SERPING1
P05556	integrin, beta 1 (fibronectin receptor, beta polypeptide, antigen CD29 includes MDF2, MSK12)	upregulated in lung tumours	ITGB1	12020426
P07199	centromere protein B, 80kDa	ablation gives better survival in breast cancer	CENPB	20222802
P08567	pleckstrin	might be a contributor to transformation	PLEK	10860665
P09622	dihydrolipoamide dehydrogenase		DLD
P09651	heterogeneous nuclear ribonucleoprotein A1-like 3; similar to heterogeneous nuclear ribonucleoprotein A1; heterogeneous nuclear ribonucleoprotein A1 pseudogene 2; heterogeneous nuclear ribonucleoprotein A1; heterogeneous nuclear ribonucleoprotein A1 pseudogene	elevated in some cancers	HNRNPA1	14633690
P14618	similar to Pyruvate kinase, isozymes M1/M2 (Pyruvate kinase muscle isozyme) (Cytosolic thyroid hormone-binding protein) (CTHBP) (THBP1); pyruvate kinase, muscle	elevated in colorectal cancer	PKM	12820312
P15291	UDP-Gal:betaGlcNAc beta 1,4- galactosyltransferase, polypeptide 1		B4GALT1
P15924	desmoplakin	high expression in squamous cell carcinoma	DSP	11955647
P16455	O-6-methylguanine-DNA methyltransferase	well characterised cancer gene	MGMT
P16473	thyroid stimulating hormone receptor	mutated in adenocarcinoma	TSHR	22842620
P18075	bone morphogenetic protein 7	highly expressed in Lunc Cancer	BMP7	22447022
P26358	DNA (cytosine-5-)-methyltransferase 1	well characterised cancer gene	DNMT1
P30307	cell division cycle 25 homolog C (S. pombe)	well characterised cancer gene	CDC25C
P30613	pyruvate kinase, liver and RBC		PKLR
P37231	peroxisome proliferator-activated receptor gamma	well characterised cancer gene	PPARG
P39900	matrix metallopeptidase 12 (macrophage elastase)	High expression in prostate cancer cells	MMP12	18324629
P43632	killer cell immunoglobulin-like receptor, two domains, short cytoplasmic tail, 2; killer cell immunoglobulin-like receptor, two domains, short cytoplasmic tail, 4	Accociated with leukemia	KIR2DS4	18463675
P47989	xanthine dehydrogenase	Mediates abnormal metabolism in mammary tumors	XDH	1635086
P48060	GLI pathogenesis-related 1	Suppresses prostate cancer	GLIPR1	22025562
P49005	polymerase (DNA directed), delta 2, regulatory subunit 50kDa	Prognostic marker	POLD2	21079801
P53582	methionyl aminopeptidase 1	Targets for gastrointestinal cancer	METAP1	20583970
P54274	similar to telomeric repeat binding factor (NIMA-interacting) 1; telomeric repeat binding factor (NIMA-interacting) 1; telomeric repeat binding factor (NIMA-interacting) 1 pseudogene	Well characterised cancer gene	TERF1
P54819	adenylate kinase 2	Mediates apoptotic pathway	AK2	17952061
P60953	cell division cycle 42 (GTP binding protein, 25kDa); cell division cycle 42 pseudogene 2	Regulates endothelial interaction with cancer cells	CDC42	23148235
P62837	ubiquitin-conjugating enzyme E2D 2 (UBC4/5 homolog, yeast)	E2s can interact with BRCA1	UBE2D2	19712108
P62937	similar to TRIMCyp; peptidylprolyl isomerase A (cyclophilin A); peptidylprolyl isomerase A (cyclophilin A)-like 3	Marker of renal tumours	PPIA	22089348
P68400	casein kinase 2, alpha 1 polypeptide pseudogene; casein kinase 2, alpha 1 polypeptide	Inhibition induces p53-dependent cell cycle arrest	CSNK2A1	22318540
P78324	signal-regulatory protein alpha	Regulates cell adhesion in astrocytomas	SIRPA	14729615
P78536	ADAM metallopeptidase domain 17	Releases membrane bound tumor necrosis factor (TNF)-α precursor	ADAM17	20184396
P78540	arginase, type II	Expressed in lung cancer	ARG2	18528866
Q03181	peroxisome proliferator-activated receptor delta	May regulate cancer cell growth	PPARD	18584037
Q08AH3	acyl-CoA synthetase medium-chain family member 2A		ACSM2A
Q13569	similar to G/T mismatch-specific thymine DNA glycosylase; thymine-DNA glycosylase	DNA repair function	TDG	21722948
Q15717	ELAV (embryonic lethal, abnormal vision, Drosophila)-like 1 (Hu antigen R)	Overexpressed in breast cancer	ELAVL1	23401122
Q16832	discoidin domain receptor tyrosine kinase 2	potentially a target in some lung cancers	DDR2	22328973
Q49A26	cytokine-like nuclear factor n-pac	Regulates p38α MAPK	GLYR1	21544814
Q5R372	RAB GTPase activating protein 1-like	Diffentially regulated in bladder cancer	RABGAP1L	22724020
Q6ISU1	pre T-cell antigen receptor alpha	Has a role in thymocyte survival, proliferation, and activation	PTCRA	11891328
Q86US8	Smg-6 homolog, nonsense mediated mRNA decay factor (C. elegans)	Controls telomere length	SMG6	17940095
Q8IY67	ribonucleoprotein, PTB-binding 1	Interacts with vinculin	RAVER1	21207485
Q8N149	leukocyte immunoglobulin-like receptor, subfamily A (with TM domain), member 2		LILRA2
Q8N6T3	ADP-ribosylation factor GTPase activating protein 1	Is expressed in highly invasive breast cancers	ARFGAP1	15719014
Q8TEK3	DOT1-like, histone H3 methyltransferase (S. cerevisiae)	mediates epigenetic modification	DOT1L	15851025
Q8WXI4	acyl-CoA thioesterase 11		ACOT11
Q92793	CREB binding protein	muations may cause relapse in leukemia	CREBBP	21390130
Q92932	protein tyrosine phosphatase, receptor type, N polypeptide 2	Hypermethylated	PTPRN2	23280481
Q96DC8	enoyl Coenzyme A hydratase domain containing 3	ECHDC1 was associated with breast cancer risk	ECHDC3	18326623
Q96HS1	phosphoglycerate mutase family member 5	important component of necrotic pathways	PGAM5	22265414
Q99728	BRCA1 associated RING domain 1	has a tumour suppressing function	BARD1	16633366
Q9H0U4	RAB1B, member RAS oncogene family	controls expression if cancer genes	RAB1B	23325787
Q9H227	glucosidase, beta, acid 3 (cytosolic)		GBA3
Q9H9Q4	nonhomologous end-joining factor 1	DNA breakage repair	NHEJ1	17191205
Q9UGB7	myo-inositol oxygenase		MIOX
Q9UHC9	NPC1 (Niemann-Pick disease, type C1, gene)-like 1		NPC1L1
Q9UNA0	ADAM metallopeptidase with thrombospondin type 1 motif, 5	expressed in prostate cancer	ADAMTS5	15599946
Q9Y2T3	guanine deaminase	secreted by gynecological tumours	GDA	17649829
Q9Y5K2	kallikrein-related peptidase 4	expressed in prostate tumour	KLK4	12077288
Q9Y5K5	ubiquitin carboxyl-terminal hydrolase L5	has a role inside ubiquitin pathway	UCHL5	22057347
Q9Y6R0	numb homolog (Drosophila)-like	mediates tumour cell migrations	NUMBL	23440423
