# Supplementary material for: Deriving a Mutation Index of Carcinogenicity Using Protein Structure and Protein Interfaces
Source: PLoS One. 2014 Jan 15;9(1):e84598. doi: 10.1371/journal.pone.0084598 (PMC3893166; doi:10.1371/journal.pone.0084598)
Supplement: Table S9 — InCa scores and predictions for the lung adenocarcinoma data set. (XLS) [file pone.0084598.s028.xls]

## Sheet: Sheet1
Protein	UniprotID	Mutation	Loc	WT	MT	FI score	FI impact	InCa score	InCa impact
P54652	HSP72_HUMAN	A245T	245	A	T	1.495	low	0.0860333	neutral
Q86W56	PARG_HUMAN	A584T	584	A	T	1.905	medium	0.1086	neutral
Q9H2C0	GAN_HUMAN	A220S	220	A	S	0.82	low	0.121067	neutral
Q9Y6Y9	LY96_HUMAN	S141R	141	S	R	1.245	low	0.126567	neutral
P12883	MYH7_HUMAN	R712H	712	R	H	3.785	high	0.1289	neutral
P02549	SPTA1_HUMAN	T85N	85	T	N	2.795	medium	0.129967	neutral
P78324	SHPS1_HUMAN	V233I	233	V	I	0.805	low	0.131433	neutral
Q49A26	GLYR1_HUMAN	R508H	508	R	H	1.59	low	0.136867	neutral
O94829	IPO13_HUMAN	I653M	653	I	M	NA		0.137533	neutral
P78324	SHPS1_HUMAN	V230M	230	V	M	3.65	high	0.146267	neutral
Q6DN90	IQEC1_HUMAN	R871M	871	R	M	NA		0.150533	neutral
P27352	IF_HUMAN	A64S	64	A	S	1.845	low	0.158	neutral
Q15118	PDK1_HUMAN	V303I	303	V	I	1.32	low	0.1604	neutral
O43854	EDIL3_HUMAN	T55K	55	T	K	1.67	low	0.161567	neutral
P08684	CP3A4_HUMAN	T363M	363	T	M	4.425	high	0.161933	neutral
Q01826	SATB1_HUMAN	A148S	148	A	S	1.67	low	0.163067	neutral
Q9HD67	MYO10_HUMAN	K1680R	1680	K	R	NA		0.166867	neutral
P78410	BT3A2_HUMAN	M58V	58	M	V	1.27	low	0.167867	neutral
Q9UQ84	EXO1_HUMAN	R199L	199	R	L	1.15	low	0.168467	neutral
Q9UBE0	SAE1_HUMAN	Q271H	271	Q	H	2.36	medium	0.168667	neutral
P49366	DHYS_HUMAN	I108M	108	I	M	2.705	medium	0.1704	neutral
Q9Y600	CSAD_HUMAN	A183S	183	A	S	2.125	medium	0.1721	neutral
Q8NEB9	PK3C3_HUMAN	S687L	687	S	L	4.04	high	0.1743	neutral
P35269	T2FA_HUMAN	R499Q	499	R	Q	1.59	low	0.182467	neutral
Q9Y600	CSAD_HUMAN	R226K	226	R	K	NA		0.1834	neutral
Q9NVP1	DDX18_HUMAN	M265I	265	M	I	NA		0.1835	neutral
O95749	GGPPS_HUMAN	A111S	111	A	S	2.32	medium	0.1857	neutral
P15144	AMPN_HUMAN	D571N	571	D	N	NA		0.191167	neutral
O60583	CCNT2_HUMAN	I62V	62	I	V	2.13	medium	0.1926	neutral
Q8TBE9	NANP_HUMAN	A111S	111	A	S	NA		0.194367	neutral
Q96BD6	SPSB1_HUMAN	M106I	106	M	I	NA		0.196167	neutral
Q13813	SPTN1_HUMAN	I1484M	1484	I	M	NA		0.196833	neutral
P48059	LIMS1_HUMAN	A18V	18	A	V	NA		0.197833	neutral
Q9H227	GBA3_HUMAN	G299A	299	G	A	1.865	low	0.203567	neutral
P18858	DNLI1_HUMAN	R413W	413	R	W	1.76	low	0.204833	neutral
Q9Y2S2	CRYL1_HUMAN	S65F	65	S	F	2.465	medium	0.2066	neutral
Q8WTS6	SETD7_HUMAN	T203S	203	T	S	0.95	low	0.2112	neutral
P13010	XRCC5_HUMAN	M357I	357	M	I	1.75	low	0.213967	neutral
O43323	DHH_HUMAN	R122H	122	R	H	2.14	medium	0.214567	neutral
P29508	SPB3_HUMAN	N48K	48	N	K	1.33	low	0.214767	neutral
Q5T1C6	THEM4_HUMAN	V210I	210	V	I	1.515	low	0.215167	neutral
P49767	VEGFC_HUMAN	M174I	174	M	I	1.355	low	0.2157	neutral
Q13705	AVR2B_HUMAN	Q228H	228	Q	H	1.545	low	0.2163	neutral
P41208	CETN2_HUMAN	M97I	97	M	I	2.095	medium	0.217233	neutral
P30504	1C04_HUMAN	A206T	206	A	T	NA		0.217467	neutral
P17707	DCAM_HUMAN	A139S	139	A	S	NA		0.218467	neutral
P10114	RAP2A_HUMAN	M143I	143	M	I	NA		0.220924	neutral
Q9BRQ0	PYGO2_HUMAN	R334Q	334	R	Q	NA		0.222	neutral
P01574	IFNB_HUMAN	E102K	102	E	K	2.685	medium	0.222067	neutral
Q9Y3Q0	NALD2_HUMAN	E77D	77	E	D	2.01	medium	0.2232	neutral
O00444	PLK4_HUMAN	E10Q	10	E	Q	NA		0.227967	neutral
Q9UGP5	DPOLL_HUMAN	Q247H	247	Q	H	2.005	medium	0.229067	neutral
Q9Y232	CDYL1_HUMAN	V573M	573	V	M	NA		0.229967	neutral
Q9H3S4	TPK1_HUMAN	E81Q	81	E	Q	1.64	low	0.234433	neutral
Q16678	CP1B1_HUMAN	R278M	278	R	M	1.76	low	0.2367	neutral
Q658P3	STEA3_HUMAN	V86L	86	V	L	NA		0.238733	neutral
P23526	SAHH_HUMAN	I247V	247	I	V	2.785	medium	0.239267	neutral
P14210	HGF_HUMAN	V589L	589	V	L	1.35	low	0.241833	neutral
Q9Y3Q4	HCN4_HUMAN	R612H	612	R	H	2.31	medium	0.242033	neutral
P27037	AVR2A_HUMAN	E348G	348	E	G	1.355	low	0.242167	neutral
Q13938	CAYP1_HUMAN	R131H	131	R	H	1.34	low	0.242433	neutral
Q9NZN5	ARHGC_HUMAN	L68V	68	L	V	1.905	medium	0.2441	neutral
Q30201	HFE_HUMAN	E128D	128	E	D	NA		0.244833	neutral
P52701	MSH6_HUMAN	C615F	615	C	F	NA		0.245933	neutral
Q08AH3	ACS2A_HUMAN	T406K	406	T	K	NA		0.2464	neutral
O75460	ERN1_HUMAN	A783T	783	A	T	NA		0.246633	neutral
Q14019	COTL1_HUMAN	A77V	77	A	V	NA		0.246667	neutral
P55735	SEC13_HUMAN	E209Q	209	E	Q	NA		0.2469	neutral
Q8WUA7	TB22A_HUMAN	I223V	223	I	V	NA		0.247633	neutral
P53004	BIEA_HUMAN	M199I	199	M	I	0.895	low	0.248067	neutral
Q9NXS2	QPCTL_HUMAN	A128S	128	A	S	1.59	low	0.2486	neutral
P20702	ITAX_HUMAN	V527L	527	V	L	1.145	low	0.249233	neutral
Q96PE7	MCEE_HUMAN	R104S	104	R	S	NA		0.2565	neutral
Q53H82	LACB2_HUMAN	R14L	14	R	L	1.49	low	0.2571	neutral
P36404	ARL2_HUMAN	V160A	160	V	A	2.13	medium	0.2574	neutral
P08118	MSMB_HUMAN	D92N	92	D	N	NA		0.258833	neutral
P49643	PRI2_HUMAN	I431T	431	I	T	NA		0.259233	neutral
P02549	SPTA1_HUMAN	R156Q	156	R	Q	NA		0.259833	neutral
P41594	GRM5_HUMAN	A174T	174	A	T	1.92	medium	0.262367	neutral
P05093	CP17A_HUMAN	A367V	367	A	V	NA		0.263	neutral
Q99952	PTN18_HUMAN	D262H	262	D	H	1.15	low	0.2634	neutral
Q13576	IQGA2_HUMAN	R1522T	1522	R	T	NA		0.2643	neutral
O00522	KRIT1_HUMAN	T65R	65	T	R	NA		0.264333	neutral
O14980	XPO1_HUMAN	Q136L	136	Q	L	2.39	medium	0.264567	neutral
Q13285	STF1_HUMAN	F383L	383	F	L	NA		0.2663	neutral
O14792	HS3S1_HUMAN	Y96F	96	Y	F	1.54	low	0.266933	neutral
P06734	FCER2_HUMAN	R263W	263	R	W	0.885	low	0.267033	neutral
O43159	RRP8_HUMAN	R304H	304	R	H	1.59	low	0.267233	neutral
Q9BV47	DUS26_HUMAN	G146R	146	G	R	2.975	medium	0.267333	neutral
Q14315	FLNC_HUMAN	K2591N	2591	K	N	1.85	low	0.268233	neutral
O60547	GMDS_HUMAN	S90C	90	S	C	3.995	high	0.2686	neutral
O15520	FGF10_HUMAN	E93D	93	E	D	NA		0.268633	neutral
P20339	RAB5A_HUMAN	M175I	175	M	I	NA		0.270433	neutral
P15169	CBPN_HUMAN	V157L	157	V	L	1.49	low	0.2707	neutral
Q9Y2R2	PTN22_HUMAN	S220C	220	S	C	1.375	low	0.271	neutral
P04222	1C03_HUMAN	A206T	206	A	T	NA		0.272667	neutral
P21359	NF1_HUMAN	N1673S	1673	N	S	2.535	medium	0.274267	neutral
Q5TD97	FHL5_HUMAN	A235D	235	A	D	1.145	low	0.274667	neutral
P19099	C11B2_HUMAN	I197M	197	I	M	1.015	low	0.2774	neutral
Q05193	DYN1_HUMAN	R256Q	256	R	Q	1.71	low	0.278167	neutral
P06870	KLK1_HUMAN	E260D	260	E	D	NA		0.2792	neutral
P05107	ITB2_HUMAN	E347Q	347	E	Q	1.805	low	0.2796	neutral
Q9HAV4	XPO5_HUMAN	A674S	674	A	S	NA		0.280233	neutral
Q96A44	SPSB4_HUMAN	P232S	232	P	S	3.16	medium	0.280367	neutral
P10415	BCL2_HUMAN	M115I	115	M	I	1.19	low	0.2805	neutral
P08581	MET_HUMAN	S441C	441	S	C	3.045	medium	0.283567	neutral
Q5TD97	FHL5_HUMAN	D242H	242	D	H	3.235	medium	0.2836	neutral
P20337	RAB3B_HUMAN	M96L	96	M	L	1.14	low	0.2869	neutral
Q9BRX5	PSF3_HUMAN	Q136L	136	Q	L	1.545	low	0.287467	neutral
P15085	CBPA1_HUMAN	I146T	146	I	T	2.095	medium	0.287533	neutral
P63208	SKP1_HUMAN	K80R	80	K	R	1.765	low	0.287767	neutral
Q06141	REG3A_HUMAN	S138Y	138	S	Y	2.655	medium	0.288967	neutral
P19878	NCF2_HUMAN	I91M	91	I	M	1.445	low	0.2895	neutral
Q9Y2T3	GUAD_HUMAN	P62Q	62	P	Q	NA		0.289633	neutral
P48357	LEPR_HUMAN	V600F	600	V	F	2.67	medium	0.290833	neutral
O00311	CDC7_HUMAN	E84K	84	E	K	NA		0.2911	neutral
Q14145	KEAP1_HUMAN	R470H	470	R	H	1.58	low	0.292267	neutral
Q8N0Z6	TTC5_HUMAN	G334C	334	G	C	1.905	medium	0.294367	neutral
P06681	CO2_HUMAN	E140K	140	E	K	NA		0.294933	neutral
Q9Y217	MTMR6_HUMAN	R309L	309	R	L	1.78	low	0.295167	neutral
P55273	CDN2D_HUMAN	R135S	135	R	S	0.88	low	0.297567	neutral
P21580	TNAP3_HUMAN	N359K	359	N	K	NA		0.298167	neutral
P29508	SPB3_HUMAN	T9N	9	T	N	1.08	low	0.2982	neutral
Q9BYX4	IFIH1_HUMAN	E746K	746	E	K	NA		0.299867	neutral
Q16288	NTRK3_HUMAN	G652R	652	G	R	NA		0.300167	neutral
P30520	PURA2_HUMAN	E108Q	108	E	Q	1.815	low	0.3023	neutral
Q9UNP9	PPIE_HUMAN	E58D	58	E	D	1.25	low	0.3029	neutral
P84022	SMAD3_HUMAN	R268H	268	R	H	3.47	medium	0.302967	neutral
Q13576	IQGA2_HUMAN	V1479L	1479	V	L	NA		0.3043	neutral
O14595	CTDS2_HUMAN	Q99R	99	Q	R	NA		0.306133	neutral
P11586	C1TC_HUMAN	S92F	92	S	F	2.76	medium	0.306467	neutral
Q9Y3Q4	HCN4_HUMAN	R713H	713	R	H	2.42	medium	0.3065	neutral
P02763	A1AG1_HUMAN	V134L	134	V	L	NA		0.3066	neutral
O75581	LRP6_HUMAN	R1026H	1026	R	H	1.44	low	0.306767	neutral
P07451	CAH3_HUMAN	K57N	57	K	N	2.555	medium	0.308167	neutral
P11387	TOP1_HUMAN	I377V	377	I	V	NA		0.308467	neutral
Q9P1W8	SIRPG_HUMAN	R74Q	74	R	Q	2.28	medium	0.308733	neutral
P54317	LIPR2_HUMAN	N82K	82	N	K	NA		0.309133	neutral
P48052	CBPA2_HUMAN	V95L	95	V	L	NA		0.3096	neutral
Q9UBT2	SAE2_HUMAN	I532M	532	I	M	2.165	medium	0.310467	neutral
P35221	CTNA1_HUMAN	Q687E	687	Q	E	1.915	medium	0.310667	neutral
Q8WV22	NSE1_HUMAN	E103Q	103	E	Q	1.095	low	0.310733	neutral
P00813	ADA_HUMAN	E320K	320	E	K	1.475	low	0.3113	neutral
P17342	ANPRC_HUMAN	A426P	426	A	P	1.7	low	0.312367	neutral
Q99959	PKP2_HUMAN	D428H	428	D	H	2.305	medium	0.3125	neutral
P35813	PPM1A_HUMAN	M112I	112	M	I	0.905	low	0.313467	neutral
Q9BRG1	VPS25_HUMAN	L149V	149	L	V	3.325	medium	0.3139	neutral
P25116	PAR1_HUMAN	T345N	345	T	N	NA		0.3148	neutral
P30153	2AAA_HUMAN	A541G	541	A	G	3.025	medium	0.317467	neutral
Q9UKE5	TNIK_HUMAN	E128Q	128	E	Q	NA		0.319567	neutral
P08253	MMP2_HUMAN	G537A	537	G	A	3.29	medium	0.321767	neutral
Q9ULT8	HECD1_HUMAN	R1279C	1279	R	C	3.22	medium	0.323	neutral
P54315	LIPR1_HUMAN	T191S	191	T	S	2.03	medium	0.3235	neutral
P14210	HGF_HUMAN	E608K	608	E	K	1.255	low	0.323867	neutral
O14933	UB2L6_HUMAN	P133L	133	P	L	1.89	low	0.325333	neutral
P21589	5NTD_HUMAN	P416T	416	P	T	4.075	high	0.326233	neutral
P09104	ENOG_HUMAN	M182L	182	M	L	NA		0.326867	neutral
P43378	PTN9_HUMAN	S476L	476	S	L	2.665	medium	0.327233	neutral
O00206	TLR4_HUMAN	V33F	33	V	F	1.1	low	0.327933	neutral
Q13477	MADCA_HUMAN	A136G	136	A	G	1.1	low	0.328967	neutral
P49862	KLK7_HUMAN	D175Y	175	D	Y	NA		0.329633	neutral
P46527	CDN1B_HUMAN	E39Q	39	E	Q	2.42	medium	0.331467	neutral
Q99259	DCE1_HUMAN	G238E	238	G	E	3.07	medium	0.331767	neutral
Q15661	TRYB1_HUMAN	P144H	144	P	H	1.105	low	0.334333	neutral
O60462	NRP2_HUMAN	L281M	281	L	M	2.115	medium	0.334667	neutral
Q96PU4	UHRF2_HUMAN	R802Q	802	R	Q	2.87	medium	0.335133	neutral
O15527	OGG1_HUMAN	T65A	65	T	A	1.915	medium	0.3352	neutral
Q13332	PTPRS_HUMAN	K1913N	1913	K	N	2.46	medium	0.336333	neutral
P06276	CHLE_HUMAN	V496M	496	V	M	NA		0.3372	neutral
Q15771	RAB30_HUMAN	P36L	36	P	L	NA		0.337733	neutral
P43628	KI2L3_HUMAN	Q110K	110	Q	K	1.115	low	0.3378	neutral
Q92785	REQU_HUMAN	H230Y	230	H	Y	2.66	medium	0.338067	neutral
P32929	CGL_HUMAN	G50W	50	G	W	1.535	low	0.339067	neutral
Q13185	CBX3_HUMAN	A75V	75	A	V	3.045	medium	0.339167	neutral
P08581	MET_HUMAN	Y321H	321	Y	H	1.56	low	0.339767	neutral
Q9NX01	TXN4B_HUMAN	E23D	23	E	D	NA		0.3398	neutral
Q99523	SORT_HUMAN	E708Q	708	E	Q	1.955	medium	0.3401	neutral
Q13618	CUL3_HUMAN	G194D	194	G	D	2.475	medium	0.340367	neutral
P04035	HMDH_HUMAN	G849V	849	G	V	4.045	high	0.342833	neutral
Q9HCJ6	VAT1L_HUMAN	A356T	356	A	T	1.725	low	0.3429	neutral
Q02108	GCYA3_HUMAN	R624S	624	R	S	1.315	low	0.343067	neutral
O14929	HAT1_HUMAN	R336L	336	R	L	1.415	low	0.343533	neutral
P52597	HNRPF_HUMAN	E6Q	6	E	Q	2.275	medium	0.3439	neutral
Q16288	NTRK3_HUMAN	V704F	704	V	F	1.455	low	0.344667	neutral
P14866	HNRPL_HUMAN	R398L	398	R	L	2.125	medium	0.344967	neutral
P08263	GSTA1_HUMAN	V167G	167	V	G	3.15	medium	0.345033	neutral
O14980	XPO1_HUMAN	M1054I	1054	M	I	2.62	medium	0.345333	neutral
Q96QB1	RHG07_HUMAN	D1195E	1195	D	E	1.71	low	0.345867	neutral
P52757	CHIO_HUMAN	K41N	41	K	N	1.59	low	0.346133	neutral
Q6DN90	IQEC1_HUMAN	E877Q	877	E	Q	NA		0.346733	neutral
P09972	ALDOC_HUMAN	G91V	91	G	V	3.575	high	0.3468	neutral
O75844	FACE1_HUMAN	R412C	412	R	C	3.29	medium	0.349933	neutral
Q9UNN5	FAF1_HUMAN	C17F	17	C	F	1.545	low	0.351067	neutral
P11277	SPTB1_HUMAN	L1194F	1194	L	F	1.5	low	0.351333	neutral
Q15399	TLR1_HUMAN	R337H	337	R	H	NA		0.3537	neutral
P45379	TNNT2_HUMAN	Q248H	248	Q	H	1.385	low	0.354067	neutral
Q9NP79	VTA1_HUMAN	A3S	3	A	S	NA		0.3543	neutral
P41159	LEP_HUMAN	G166V	166	G	V	1.995	medium	0.3544	neutral
P49863	GRAK_HUMAN	V108D	108	V	D	NA		0.354833	neutral
Q6NYC1	JMJD6_HUMAN	E103K	103	E	K	2.515	medium	0.355067	neutral
P81274	GPSM2_HUMAN	F46L	46	F	L	1.43	low	0.355333	neutral
Q06141	REG3A_HUMAN	G82W	82	G	W	1.46	low	0.355767	neutral
P26998	CRBB3_HUMAN	R152C	152	R	C	3.22	medium	0.356867	neutral
Q15700	DLG2_HUMAN	G472C	472	G	C	3.93	high	0.3569	neutral
Q9GZM8	NDEL1_HUMAN	K108R	108	K	R	1.02	low	0.357367	neutral
P05106	ITB3_HUMAN	M144I	144	M	I	3.165	medium	0.357733	neutral
P15085	CBPA1_HUMAN	F192L	192	F	L	0.99	low	0.3578	neutral
Q70E73	RAPH1_HUMAN	E375Q	375	E	Q	0.83	low	0.3578	neutral
P15814	IGLL1_HUMAN	S108G	108	S	G	NA		0.360267	neutral
P00747	PLMN_HUMAN	R89T	89	R	T	1.545	low	0.3616	neutral
Q7L2J0	MEPCE_HUMAN	I603M	603	I	M	NA		0.362733	neutral
Q9H0H5	RGAP1_HUMAN	R402T	402	R	T	1.375	low	0.363	neutral
O14508	SOCS2_HUMAN	E64D	64	E	D	NA		0.363533	neutral
Q96JM7	LMBL3_HUMAN	S386L	386	S	L	2.53	medium	0.364267	neutral
O60704	TPST2_HUMAN	V128G	128	V	G	2.455	medium	0.364667	neutral
Q9HAQ2	KIF9_HUMAN	Q80K	80	Q	K	NA		0.3655	neutral
P15086	CBPB1_HUMAN	S143C	143	S	C	2.625	medium	0.3657	neutral
P29508	SPB3_HUMAN	L4V	4	L	V	2.035	medium	0.3666	neutral
P05181	CP2E1_HUMAN	I42M	42	I	M	2.44	medium	0.367333	neutral
Q8IYD8	FANCM_HUMAN	T746I	746	T	I	2.36	medium	0.367933	neutral
Q9Y6M4	KC1G3_HUMAN	G52C	52	G	C	5.085	high	0.3686	neutral
O14770	MEIS2_HUMAN	M291I	291	M	I	2.44	medium	0.368933	neutral
Q9NZ09	UBAP1_HUMAN	R393Q	393	R	Q	1.1	low	0.369433	neutral
P13612	ITA4_HUMAN	V494L	494	V	L	1.955	medium	0.370567	neutral
P02743	SAMP_HUMAN	T100I	100	T	I	NA		0.370633	neutral
O43704	ST1B1_HUMAN	P101L	101	P	L	3.515	high	0.3724	neutral
P35968	VGFR2_HUMAN	S281Y	281	S	Y	NA		0.377067	neutral
P49643	PRI2_HUMAN	K293I	293	K	I	1.82	low	0.377233	neutral
P43358	MAGA4_HUMAN	E225K	225	E	K	2.14	medium	0.377267	neutral
O94992	HEXI1_HUMAN	R321C	321	R	C	1.735	low	0.3773	neutral
P02549	SPTA1_HUMAN	R41G	41	R	G	NA		0.3797	neutral
P98170	XIAP_HUMAN	Q492K	492	Q	K	0.98	low	0.381	neutral
P12883	MYH7_HUMAN	S111Y	111	S	Y	2.61	medium	0.381967	neutral
Q02763	TIE2_HUMAN	H881R	881	H	R	NA		0.384433	neutral
Q9Y600	CSAD_HUMAN	P255H	255	P	H	3.705	high	0.384467	neutral
P06400	RB_HUMAN	E398L	398	E	L	NA		0.385367	neutral
P81274	GPSM2_HUMAN	V44M	44	V	M	1.79	low	0.385367	neutral
Q08050	FOXM1_HUMAN	R256G	256	R	G	1.565	low	0.3856	neutral
P08473	NEP_HUMAN	D112H	112	D	H	2.215	medium	0.385833	neutral
O95363	SYFM_HUMAN	K69M	69	K	M	0.975	low	0.3887	neutral
Q9UGJ1	GCP4_HUMAN	E346V	346	E	V	0.85	low	0.388733	neutral
P07996	TSP1_HUMAN	N858I	858	N	I	3.335	medium	0.389	neutral
P01574	IFNB_HUMAN	R32K	32	R	K	2.76	medium	0.390933	neutral
P05771	KPCB_HUMAN	M564V	564	M	V	NA		0.392133	neutral
P32119	PRDX2_HUMAN	K26I	26	K	I	2.42	medium	0.3925	neutral
P02743	SAMP_HUMAN	F69L	69	F	L	2.275	medium	0.395567	neutral
Q9H4Y5	GSTO2_HUMAN	E156V	156	E	V	2.49	medium	0.3956	neutral
P12814	ACTN1_HUMAN	R133L	133	R	L	3.645	high	0.395967	neutral
P20701	ITAL_HUMAN	M183I	183	M	I	1.24	low	0.396033	neutral
P49802	RGS7_HUMAN	V377L	377	V	L	1.185	low	0.396633	neutral
P08572	CO4A2_HUMAN	E1580Q	1580	E	Q	1.755	low	0.396833	neutral
P13861	KAP2_HUMAN	R23Q	23	R	Q	2.9	medium	0.397333	neutral
P16233	LIPP_HUMAN	P40H	40	P	H	3.115	medium	0.3981	neutral
Q13133	NR1H3_HUMAN	R227L	227	R	L	2.215	medium	0.398467	neutral
P16104	H2AX_HUMAN	Q138K	138	Q	K	NA		0.3993	neutral
Q13627	DYR1A_HUMAN	L164F	164	L	F	0.97	low	0.3994	neutral
Q15661	TRYB1_HUMAN	G33R	33	G	R	2.87	medium	0.400633	neutral
P13929	ENOB_HUMAN	F106L	106	F	L	NA		0.400933	neutral
P06744	G6PI_HUMAN	K147N	147	K	N	3.345	medium	0.401033	neutral
Q9NQS3	PVRL3_HUMAN	D349H	349	D	H	0.865	low	0.4012	neutral
P06865	HEXA_HUMAN	S501L	501	S	L	NA		0.402267	neutral
P07477	TRY1_HUMAN	V165L	165	V	L	NA		0.404	neutral
Q92913	FGF13_HUMAN	A192S	192	A	S	NA		0.405667	neutral
Q8WWP7	GIMA1_HUMAN	V135L	135	V	L	NA		0.406567	neutral
P01031	CO5_HUMAN	G69C	69	G	C	2.175	medium	0.406767	neutral
P39905	GDNF_HUMAN	G133V	133	G	V	2.565	medium	0.407733	neutral
Q9UN19	DAPP1_HUMAN	P162L	162	P	L	NA		0.4086	neutral
Q13191	CBLB_HUMAN	R325G	325	R	G	2.3	medium	0.410067	neutral
Q8N4E7	FTMT_HUMAN	V106L	106	V	L	3.11	medium	0.410133	neutral
O14788	TNF11_HUMAN	S285F	285	S	F	1.04	low	0.410833	neutral
P18887	XRCC1_HUMAN	E98K	98	E	K	2.595	medium	0.411133	neutral
Q99584	S10AD_HUMAN	S69W	69	S	W	NA		0.412333	neutral
Q6UWW0	LCN15_HUMAN	L23Q	23	L	Q	1.87	low	0.412567	neutral
Q13162	PRDX4_HUMAN	K265N	265	K	N	1.795	low	0.412667	neutral
P84022	SMAD3_HUMAN	R243C	243	R	C	3.525	high	0.412767	neutral
Q9UIK4	DAPK2_HUMAN	Q291L	291	Q	L	1.04	low	0.412767	neutral
Q8WV41	SNX33_HUMAN	Q553K	553	Q	K	2.54	medium	0.413367	neutral
P40189	IL6RB_HUMAN	A359T	359	A	T	2.69	medium	0.4138	neutral
P52799	EFNB2_HUMAN	M158I	158	M	I	2.72	medium	0.414033	neutral
Q96HE7	ERO1A_HUMAN	W197R	197	W	R	1.07	low	0.4149	neutral
P55212	CASP6_HUMAN	E247K	247	E	K	2.01	medium	0.415767	neutral
P49862	KLK7_HUMAN	Q107K	107	Q	K	NA		0.416133	neutral
O00478	BT3A3_HUMAN	E61K	61	E	K	1.845	low	0.416667	neutral
Q13114	TRAF3_HUMAN	A412V	412	A	V	1.155	low	0.416833	neutral
P09211	GSTP1_HUMAN	D118Y	118	D	Y	2.15	medium	0.418133	neutral
P27348	1433T_HUMAN	S57F	57	S	F	2.795	medium	0.418333	neutral
O15357	SHIP2_HUMAN	V442L	442	V	L	NA		0.418467	neutral
Q99962	SH3G2_HUMAN	K172M	172	K	M	3.16	medium	0.418667	neutral
P14210	HGF_HUMAN	S145I	145	S	I	3.69	high	0.4193	neutral
O75191	XYLB_HUMAN	K78N	78	K	N	2.43	medium	0.4219	neutral
P98170	XIAP_HUMAN	M262I	262	M	I	2.045	medium	0.4223	neutral
P34931	HS71L_HUMAN	E99K	99	E	K	NA		0.424033	neutral
Q86VW2	ARHGP_HUMAN	Q352E	352	Q	E	3.195	medium	0.424067	neutral
Q10471	GALT2_HUMAN	R245K	245	R	K	1.005	low	0.4242	neutral
Q709F0	ACD11_HUMAN	L628I	628	L	I	3.45	medium	0.424333	neutral
Q08345	DDR1_HUMAN	K243N	243	K	N	NA		0.424433	neutral
P07477	TRY1_HUMAN	N77K	77	N	K	1.185	low	0.425433	neutral
P15812	CD1E_HUMAN	S49R	49	S	R	2.97	medium	0.425733	neutral
Q5FBB7	SGOL1_HUMAN	E71K	71	E	K	2.39	medium	0.426267	neutral
P01574	IFNB_HUMAN	F36S	36	F	S	NA		0.426567	neutral
Q9H840	GEMI7_HUMAN	S53F	53	S	F	1.355	low	0.4267	neutral
O60486	PLXC1_HUMAN	Q359K	359	Q	K	1.245	low	0.427233	neutral
Q9HAB8	PPCS_HUMAN	Y155C	155	Y	C	3.905	high	0.427433	neutral
P05090	APOD_HUMAN	K73N	73	K	N	NA		0.4285	neutral
P54687	BCAT1_HUMAN	W205C	205	W	C	2.37	medium	0.4291	neutral
P51946	CCNH_HUMAN	I143M	143	I	M	3.175	medium	0.4292	neutral
Q86TU7	SETD3_HUMAN	S92C	92	S	C	1.935	medium	0.431767	neutral
Q9NVV9	THAP1_HUMAN	A76T	76	A	T	3.275	medium	0.431967	neutral
P05187	PPB1_HUMAN	D94E	94	D	E	0.86	low	0.432167	neutral
P02743	SAMP_HUMAN	Q140H	140	Q	H	2.175	medium	0.4328	neutral
P49643	PRI2_HUMAN	L311I	311	L	I	3.18	medium	0.4336	neutral
O95750	FGF19_HUMAN	P176H	176	P	H	NA		0.433733	neutral
Q05086	UBE3A_HUMAN	R788W	788	R	W	3.21	medium	0.4339	neutral
Q9Y3Q4	HCN4_HUMAN	D712E	712	D	E	2.33	medium	0.434733	neutral
O15294	OGT1_HUMAN	Q681K	681	Q	K	NA		0.434833	neutral
P40121	CAPG_HUMAN	G45W	45	G	W	3.84	high	0.4355	neutral
Q99616	CCL13_HUMAN	W81R	81	W	R	NA		0.435733	neutral
P49802	RGS7_HUMAN	L448I	448	L	I	1.625	low	0.436	neutral
P13612	ITA4_HUMAN	A63V	63	A	V	1.04	low	0.436367	neutral
P12081	SYHC_HUMAN	D286N	286	D	N	2.2	medium	0.4375	neutral
P02743	SAMP_HUMAN	K106N	106	K	N	NA		0.437767	neutral
P01241	SOMA_HUMAN	P85L	85	P	L	2.38	medium	0.4381	neutral
O14936	CSKP_HUMAN	R254L	254	R	L	NA		0.438133	neutral
Q9Y2K7	KDM2A_HUMAN	Y244C	244	Y	C	3.69	high	0.438233	neutral
O43435	TBX1_HUMAN	D166N	166	D	N	3.625	high	0.439833	neutral
Q9NQS3	PVRL3_HUMAN	R306G	306	R	G	2.605	medium	0.440167	neutral
P31948	STIP1_HUMAN	S76L	76	S	L	1.93	medium	0.440633	neutral
P49862	KLK7_HUMAN	P102H	102	P	H	2.455	medium	0.4412	neutral
P06213	INSR_HUMAN	N933Y	933	N	Y	1.335	low	0.4416	neutral
Q8N9L9	ACOT4_HUMAN	Q324H	324	Q	H	2.19	medium	0.442933	neutral
Q13009	TIAM1_HUMAN	G921C	921	G	C	NA		0.443433	neutral
P00338	LDHA_HUMAN	V146L	146	V	L	2.56	medium	0.4445	neutral
P01023	A2MG_HUMAN	P92T	92	P	T	2.98	medium	0.444867	neutral
Q13133	NR1H3_HUMAN	P204S	204	P	S	2.275	medium	0.4453	neutral
O75643	U520_HUMAN	A1640D	1640	A	D	2.145	medium	0.4455	neutral
P00488	F13A_HUMAN	W188C	188	W	C	3.805	high	0.447267	neutral
Q9UQ84	EXO1_HUMAN	K330E	330	K	E	1.1	low	0.448833	neutral
P13612	ITA4_HUMAN	C486S	486	C	S	2.22	medium	0.4504	neutral
P01574	IFNB_HUMAN	Q37K	37	Q	K	NA		0.4514	neutral
P52789	HXK2_HUMAN	E724K	724	E	K	NA		0.451567	neutral
Q9BY11	PACN1_HUMAN	V195L	195	V	L	1.04	low	0.452067	neutral
P14778	IL1R1_HUMAN	E219A	219	E	A	1.215	low	0.452167	neutral
Q9Y5X1	SNX9_HUMAN	V402L	402	V	L	NA		0.452467	neutral
Q9H9A7	RMI1_HUMAN	L521V	521	L	V	2.005	medium	0.454167	neutral
O43791	SPOP_HUMAN	V179G	179	V	G	1.85	low	0.454533	neutral
P04818	TYSY_HUMAN	M149V	149	M	V	2.3	medium	0.4558	neutral
P02795	MT2_HUMAN	G10C	10	G	C	NA		0.457233	neutral
P20290	BTF3_HUMAN	N98S	98	N	S	2.25	medium	0.458733	neutral
P07327	ADH1A_HUMAN	H52N	52	H	N	1.555	low	0.4604	neutral
Q04609	FOLH1_HUMAN	V603F	603	V	F	1.08	low	0.4622	neutral
O14773	TPP1_HUMAN	Y336C	336	Y	C	3.865	high	0.4648	neutral
P21953	ODBB_HUMAN	K381Q	381	K	Q	2.35	medium	0.4656	neutral
P29218	IMPA1_HUMAN	E265Q	265	E	Q	2.245	medium	0.4668	neutral
Q9HAT8	PELI2_HUMAN	D113E	113	D	E	3.03	medium	0.468467	neutral
P11226	MBL2_HUMAN	E144K	144	E	K	1.3	low	0.4689	neutral
Q9NQW7	XPP1_HUMAN	E537K	537	E	K	4.76	high	0.469233	neutral
P00488	F13A_HUMAN	W58L	58	W	L	1.7	low	0.469333	neutral
P28329	CLAT_HUMAN	R548L	548	R	L	2.305	medium	0.4701	neutral
P00325	ADH1B_HUMAN	V84F	84	V	F	NA		0.471067	neutral
Q9Y2T3	GUAD_HUMAN	G227V	227	G	V	3.005	medium	0.471367	neutral
P13725	ONCM_HUMAN	I150F	150	I	F	0.895	low	0.4725	neutral
P48436	SOX9_HUMAN	K167T	167	K	T	1.565	low	0.4733	neutral
Q9H347	UBQL3_HUMAN	S36T	36	S	T	NA		0.473533	neutral
Q9UPY8	MARE3_HUMAN	L127V	127	L	V	NA		0.473767	neutral
P02745	C1QA_HUMAN	Q199L	199	Q	L	2.475	medium	0.474133	neutral
Q9BQI0	AIF1L_HUMAN	E47K	47	E	K	1.52	low	0.4742	neutral
Q86VP6	CAND1_HUMAN	G637V	637	G	V	NA		0.475133	neutral
Q9Y6N9	USH1C_HUMAN	A40P	40	A	P	NA		0.4761	neutral
Q05193	DYN1_HUMAN	D243Y	243	D	Y	2.29	medium	0.4787	neutral
P29317	EPHA2_HUMAN	G929C	929	G	C	3.57	high	0.4792	neutral
Q15759	MK11_HUMAN	L167M	167	L	M	0.82	low	0.4794	neutral
P02671	FIBA_HUMAN	H715Q	715	H	Q	3.69	high	0.480367	neutral
P62745	RHOB_HUMAN	A146S	146	A	S	1.095	low	0.480467	neutral
P69892	HBG2_HUMAN	H98L	98	H	L	2.53	medium	0.481633	neutral
P01920	DQB1_HUMAN	I63M	63	I	M	3.555	high	0.482267	neutral
P17028	ZNF24_HUMAN	E107G	107	E	G	3.685	high	0.482867	neutral
Q9NPG2	NGB_HUMAN	G24C	24	G	C	2.71	medium	0.4848	neutral
O14936	CSKP_HUMAN	L252V	252	L	V	2.495	medium	0.484833	neutral
P20718	GRAH_HUMAN	P29Q	29	P	Q	NA		0.486667	neutral
P26045	PTN3_HUMAN	R786G	786	R	G	4.715	high	0.487	neutral
P05543	THBG_HUMAN	L153H	153	L	H	1.815	low	0.487667	neutral
Q8WV92	MITD1_HUMAN	L157V	157	L	V	1.59	low	0.488067	neutral
Q9HBM1	SPC25_HUMAN	K203N	203	K	N	1.735	low	0.488133	neutral
Q9C0B1	FTO_HUMAN	C104F	104	C	F	1.61	low	0.489967	neutral
P78543	BTG2_HUMAN	R69G	69	R	G	3.545	high	0.490767	neutral
O96017	CHK2_HUMAN	A392V	392	A	V	4.035	high	0.491333	neutral
Q9NQL2	RRAGD_HUMAN	Y222N	222	Y	N	3.415	medium	0.491733	neutral
P06744	G6PI_HUMAN	Y341C	341	Y	C	4.285	high	0.4932	neutral
Q93009	UBP7_HUMAN	G326C	326	G	C	3.785	high	0.494933	neutral
P06746	DPOLB_HUMAN	V214F	214	V	F	1.94	medium	0.494933	neutral
Q16552	IL17_HUMAN	R69L	69	R	L	2.53	medium	0.4966	neutral
P12931	SRC_HUMAN	T246S	246	T	S	NA		0.4971	neutral
O95861	BPNT1_HUMAN	G267L	267	G	L	NA		0.497433	neutral
Q9Y6F1	PARP3_HUMAN	F440L	440	F	L	0.85	low	0.497933	neutral
P14210	HGF_HUMAN	E526D	526	E	D	0.935	low	0.498	neutral
P48736	PK3CG_HUMAN	G390W	390	G	W	2.445	medium	0.499033	neutral
Q15843	NEDD8_HUMAN	R25Q	25	R	Q	NA		0.499167	neutral
Q96FJ2	DYL2_HUMAN	S88L	88	S	L	NA		0.5012	neutral
Q9NP79	VTA1_HUMAN	L156S	156	L	S	3.225	medium	0.5033	neutral
Q15811	ITSN1_HUMAN	Y1513N	1513	Y	N	2.31	medium	0.5034	neutral
Q92466	DDB2_HUMAN	C254F	254	C	F	1.015	low	0.5039	neutral
P08514	ITA2B_HUMAN	R543L	543	R	L	1.435	low	0.5044	neutral
P13598	ICAM2_HUMAN	L117Q	117	L	Q	2.725	medium	0.504767	neutral
P56279	TCL1A_HUMAN	K30N	30	K	N	NA		0.504967	neutral
P49747	COMP_HUMAN	G579S	579	G	S	1.79	low	0.505533	neutral
Q9H840	GEMI7_HUMAN	G93A	93	G	A	0.9	low	0.505533	neutral
P14866	HNRPL_HUMAN	D390H	390	D	H	1.28	low	0.507367	neutral
Q15046	SYK_HUMAN	G405W	405	G	W	4.385	high	0.509167	neutral
Q92932	PTPR2_HUMAN	R775S	775	R	S	4.725	high	0.5107	neutral
Q15118	PDK1_HUMAN	K315M	315	K	M	3.565	high	0.5117	neutral
P54278	PMS2_HUMAN	L56V	56	L	V	NA		0.512467	neutral
Q13093	PAFA_HUMAN	D401H	401	D	H	2.33	medium	0.512933	neutral
P31151	S10A7_HUMAN	Q5E	5	Q	E	NA		0.513267	neutral
O00408	PDE2A_HUMAN	Q733K	733	Q	K	2.585	medium	0.5149	neutral
Q16875	F263_HUMAN	M375L	375	M	L	1.875	low	0.515567	neutral
P38935	SMBP2_HUMAN	E735K	735	E	K	1.24	low	0.516133	neutral
P42785	PCP_HUMAN	R189M	189	R	M	3.365	medium	0.5183	neutral
P18054	LOX12_HUMAN	R450K	450	R	K	NA		0.5196	neutral
P14410	SUIS_HUMAN	L620Q	620	L	Q	2.625	medium	0.5199	neutral
Q9NUV9	GIMA4_HUMAN	P114L	114	P	L	1.82	low	0.521833	neutral
Q05315	LPPL_HUMAN	G86D	86	G	D	2.99	medium	0.521867	neutral
P01116	RASK_HUMAN	D33E	33	D	E	1.25	low	0.5245	neutral
P14866	HNRPL_HUMAN	D390G	390	D	G	2.52	medium	0.524767	neutral
O00206	TLR4_HUMAN	D302H	302	D	H	1.895	low	0.5259	neutral
P61956	SUMO2_HUMAN	G24W	24	G	W	NA		0.528033	neutral
Q9P2W7	B3GA1_HUMAN	L115I	115	L	I	2.38	medium	0.529467	neutral
Q09013	DMPK_HUMAN	L123F	123	L	F	2.59	medium	0.532267	neutral
P10721	KIT_HUMAN	P41S	41	P	S	2.565	medium	0.532633	neutral
P11498	PYC_HUMAN	D970N	970	D	N	2.36	medium	0.5328	neutral
P60709	ACTB_HUMAN	Y240C	240	Y	C	4.4	high	0.5331	neutral
P13671	CO6_HUMAN	D869Y	869	D	Y	NA		0.533967	neutral
Q15080	NCF4_HUMAN	E272V	272	E	V	1.61	low	0.534867	neutral
Q13303	KCAB2_HUMAN	D85H	85	D	H	4.27	high	0.535667	neutral
P83916	CBX1_HUMAN	T169K	169	T	K	2.625	medium	0.5361	neutral
Q8WV41	SNX33_HUMAN	P256R	256	P	R	2.82	medium	0.536367	neutral
Q8NFP9	NBEA_HUMAN	F2241L	2241	F	L	2.755	medium	0.537733	neutral
P20849	CO9A1_HUMAN	E109K	109	E	K	2.115	medium	0.538533	neutral
P40394	ADH7_HUMAN	P75Q	75	P	Q	3.665	high	0.538733	neutral
Q86VP6	CAND1_HUMAN	Y372C	372	Y	C	2.95	medium	0.539933	neutral
O00299	CLIC1_HUMAN	D153E	153	D	E	2.11	medium	0.540233	ambiguous
P22352	GPX3_HUMAN	R123G	123	R	G	3.525	high	0.541367	ambiguous
P02787	TRFE_HUMAN	K37M	37	K	M	4.285	high	0.542233	ambiguous
Q9H444	CHM4B_HUMAN	Y75H	75	Y	H	1.56	low	0.5429	ambiguous
Q96RG2	PASK_HUMAN	E1199Q	1199	E	Q	NA		0.5432	ambiguous
P03951	FA11_HUMAN	H292R	292	H	R	2.015	medium	0.544367	ambiguous
P05386	RLA1_HUMAN	G67V	67	G	V	2.525	medium	0.5445	ambiguous
Q15485	FCN2_HUMAN	A288G	288	A	G	1.205	low	0.544567	ambiguous
O60907	TBL1X_HUMAN	H74N	74	H	N	2.775	medium	0.545	ambiguous
Q7KZF4	SND1_HUMAN	G852W	852	G	W	2.65	medium	0.546	ambiguous
Q96LB9	PGRP3_HUMAN	D296Y	296	D	Y	1.94	medium	0.5466	ambiguous
P05019	IGF1_HUMAN	E106V	106	E	V	3.05	medium	0.5471	ambiguous
O75897	ST1C4_HUMAN	E201K	201	E	K	4.065	high	0.547733	ambiguous
O60566	BUB1B_HUMAN	F196L	196	F	L	2.3	medium	0.548567	ambiguous
P29508	SPB3_HUMAN	P31L	31	P	L	4.415	high	0.548633	ambiguous
Q8IUF8	MINA_HUMAN	G289D	289	G	D	2.77	medium	0.548967	ambiguous
Q13255	GRM1_HUMAN	T295K	295	T	K	2.395	medium	0.549367	ambiguous
P00488	F13A_HUMAN	P110T	110	P	T	2.91	medium	0.549533	ambiguous
P06213	INSR_HUMAN	I1046L	1046	I	L	NA		0.550067	ambiguous
P00451	FA8_HUMAN	K1906R	1906	K	R	1.87	low	0.552695	ambiguous
P00390	GSHR_HUMAN	G202V	202	G	V	3.43	medium	0.552867	ambiguous
Q13255	GRM1_HUMAN	G161C	161	G	C	3.46	medium	0.5545	ambiguous
P00338	LDHA_HUMAN	G208A	208	G	A	3.66	high	0.556	ambiguous
P18440	ARY1_HUMAN	D57Y	57	D	Y	3.175	medium	0.557767	ambiguous
P05771	KPCB_HUMAN	P517H	517	P	H	1.8	low	0.558767	ambiguous
Q08211	DHX9_HUMAN	D428N	428	D	N	2.075	medium	0.559867	ambiguous
P10768	ESTD_HUMAN	W183C	183	W	C	3.995	high	0.56	ambiguous
P49888	ST1E1_HUMAN	L18I	18	L	I	NA		0.560467	ambiguous
Q8WTU0	DDI1_HUMAN	A287D	287	A	D	2.545	medium	0.560533	ambiguous
P20849	CO9A1_HUMAN	Q84L	84	Q	L	2.34	medium	0.561233	ambiguous
P06400	RB_HUMAN	D697E	697	D	E	2.525	medium	0.561367	ambiguous
Q99574	NEUS_HUMAN	R73C	73	R	C	2.12	medium	0.561567	ambiguous
Q15831	STK11_HUMAN	G251F	251	G	F	NA		0.5616	ambiguous
Q9UJ70	NAGK_HUMAN	G84W	84	G	W	NA		0.561933	ambiguous
P02787	TRFE_HUMAN	D633Y	633	D	Y	2.84	medium	0.5626	ambiguous
P35558	PCKGC_HUMAN	S195Y	195	S	Y	4.17	high	0.563133	ambiguous
P09210	GSTA2_HUMAN	V58A	58	V	A	3.545	high	0.5635	ambiguous
P34896	GLYC_HUMAN	G222W	222	G	W	4.24	high	0.564033	ambiguous
P02042	HBD_HUMAN	D100Y	100	D	Y	4.06	high	0.5644	ambiguous
O95711	LY86_HUMAN	G124V	124	G	V	1.935	medium	0.568733	ambiguous
P31947	1433S_HUMAN	E80Q	80	E	Q	NA		0.569067	ambiguous
Q16666	IF16_HUMAN	D305N	305	D	N	NA		0.5695	ambiguous
P35243	RECO_HUMAN	E174K	174	E	K	0.845	low	0.569833	ambiguous
Q9NPZ5	B3GA2_HUMAN	G214V	214	G	V	3.26	medium	0.5699	ambiguous
Q14457	BECN1_HUMAN	W438L	438	W	L	2.615	medium	0.569967	ambiguous
P13671	CO6_HUMAN	S556Y	556	S	Y	NA		0.575133	ambiguous
P43358	MAGA4_HUMAN	A211E	211	A	E	2.19	medium	0.5763	ambiguous
Q96QK1	VPS35_HUMAN	V491L	491	V	L	NA		0.5765	ambiguous
P47989	XDH_HUMAN	G392A	392	G	A	2.65	medium	0.578767	ambiguous
Q13477	MADCA_HUMAN	H137Q	137	H	Q	1.04	low	0.579167	ambiguous
Q9BUL8	PDC10_HUMAN	S115C	115	S	C	2.25	medium	0.5793	ambiguous
Q9UHD2	TBK1_HUMAN	G121C	121	G	C	NA		0.579567	ambiguous
Q06787	FMR1_HUMAN	G536M	536	G	M	NA		0.5801	ambiguous
P25054	APC_HUMAN	E418Q	418	E	Q	1.465	low	0.5802	ambiguous
P54868	HMCS2_HUMAN	S384L	384	S	L	1.445	low	0.581133	ambiguous
P29320	EPHA3_HUMAN	D832Y	832	D	Y	2.055	medium	0.5857	ambiguous
Q15120	PDK3_HUMAN	L66F	66	L	F	2.62	medium	0.585933	ambiguous
P02724	GLPA_HUMAN	H85L	85	H	L	2.095	medium	0.587767	ambiguous
P21953	ODBB_HUMAN	W310S	310	W	S	3.935	high	0.591567	ambiguous
P25116	PAR1_HUMAN	C254Y	254	C	Y	3.315	medium	0.5916	ambiguous
P55072	TERA_HUMAN	H183Y	183	H	Y	1.765	low	0.592833	ambiguous
P28482	MK01_HUMAN	D235V	235	D	V	2.695	medium	0.593267	ambiguous
Q01484	ANK2_HUMAN	P1082H	1082	P	H	2.33	medium	0.5935	ambiguous
Q9H9E1	ANRA2_HUMAN	E181K	181	E	K	0.87	low	0.594233	ambiguous
Q8WYN0	ATG4A_HUMAN	G232D	232	G	D	4.025	high	0.594367	ambiguous
P01730	CD4_HUMAN	V171L	171	V	L	NA		0.599433	ambiguous
P02545	LMNA_HUMAN	Y376C	376	Y	C	3.875	high	0.6006	ambiguous
P10747	CD28_HUMAN	V36F	36	V	F	2.505	medium	0.6008	ambiguous
P22303	ACES_HUMAN	A235E	235	A	E	4.445	high	0.6021	ambiguous
P60709	ACTB_HUMAN	Y91C	91	Y	C	3.55	high	0.602733	ambiguous
O96017	CHK2_HUMAN	K373E	373	K	E	NA		0.604	ambiguous
Q13093	PAFA_HUMAN	K400T	400	K	T	1.78	low	0.611633	ambiguous
Q02750	MP2K1_HUMAN	G128V	128	G	V	0.975	low	0.611733	ambiguous
P12018	VPREB_HUMAN	D109Y	109	D	Y	4.105	high	0.612367	ambiguous
P21359	NF1_HUMAN	S1282I	1282	S	I	2.78	medium	0.617467	ambiguous
Q13395	TARB1_HUMAN	S1469L	1469	S	L	3.36	medium	0.617667	ambiguous
Q8N0W4	NLGNX_HUMAN	P167H	167	P	H	3.695	high	0.617833	ambiguous
P17706	PTN2_HUMAN	S268L	268	S	L	1.045	low	0.6181	ambiguous
P11217	PYGM_HUMAN	E551K	551	E	K	NA		0.618167	ambiguous
Q9NZI2	KCIP1_HUMAN	M168I	168	M	I	2.27	medium	0.618833	ambiguous
P09917	LOX5_HUMAN	L642R	642	L	R	3.615	high	0.621067	ambiguous
P01903	DRA_HUMAN	Y175C	175	Y	C	3.395	medium	0.622367	ambiguous
P29373	RABP2_HUMAN	R60C	60	R	C	2.685	medium	0.6225	ambiguous
O60547	GMDS_HUMAN	D137Y	137	D	Y	2.955	medium	0.627233	ambiguous
P78423	X3CL1_HUMAN	G59C	59	G	C	1.79	low	0.6292	ambiguous
O60729	CC14B_HUMAN	V344L	344	V	L	NA		0.629233	ambiguous
P43358	MAGA4_HUMAN	A217D	217	A	D	3.695	high	0.629367	ambiguous
Q15661	TRYB1_HUMAN	H51R	51	H	R	NA		0.630767	ambiguous
P06213	INSR_HUMAN	G373R	373	G	R	1.985	medium	0.631367	ambiguous
P25445	TNR6_HUMAN	C143F	143	C	F	2.77	medium	0.633167	ambiguous
P12544	GRAA_HUMAN	G241C	241	G	C	3.64	high	0.6332	ambiguous
P01024	CO3_HUMAN	E1128Q	1128	E	Q	2.56	medium	0.633833	ambiguous
Q05193	DYN1_HUMAN	D321N	321	D	N	1.885	low	0.6347	ambiguous
P07858	CATB_HUMAN	G143D	143	G	D	NA		0.634833	ambiguous
P14210	HGF_HUMAN	V88F	88	V	F	NA		0.6362	ambiguous
Q9BUL8	PDC10_HUMAN	N75K	75	N	K	1.78	low	0.637733	ambiguous
Q01780	EXOSX_HUMAN	R425T	425	R	T	2.655	medium	0.638067	ambiguous
P49789	FHIT_HUMAN	V95L	95	V	L	1.485	low	0.638867	ambiguous
Q13564	ULA1_HUMAN	D433H	433	D	H	2.565	medium	0.6396	ambiguous
P10276	RARA_HUMAN	D256Y	256	D	Y	3.685	high	0.6413	ambiguous
P10276	RARA_HUMAN	F286T	286	F	T	NA		0.641333	ambiguous
O43451	MGA_HUMAN	C112Y	112	C	Y	3.545	high	0.642667	ambiguous
P20702	ITAX_HUMAN	R616I	616	R	I	2.085	medium	0.642933	ambiguous
P21953	ODBB_HUMAN	E163K	163	E	K	3.71	high	0.644233	ambiguous
P06239	LCK_HUMAN	L453V	453	L	V	NA		0.644267	ambiguous
Q16552	IL17_HUMAN	S63Y	63	S	Y	NA		0.644567	ambiguous
Q05823	RN5A_HUMAN	G168W	168	G	W	3.86	high	0.6469	ambiguous
Q9Y5S1	TRPV2_HUMAN	G130E	130	G	E	2.395	medium	0.648167	ambiguous
A6NI73	LIRA5_HUMAN	L49I	49	L	I	1.925	medium	0.6484	ambiguous
Q92882	OSTF1_HUMAN	T142P	142	T	P	4.015	high	0.650567	ambiguous
P41743	KPCI_HUMAN	W436L	436	W	L	1.305	low	0.651267	ambiguous
P29016	CD1B_HUMAN	A159P	159	A	P	3.195	medium	0.6514	ambiguous
P00325	ADH1B_HUMAN	L167Q	167	L	Q	4.32	high	0.6521	ambiguous
Q9Y3C8	UFC1_HUMAN	D103Y	103	D	Y	3.15	medium	0.652167	ambiguous
Q7L266	ASGL1_HUMAN	S200L	200	S	L	4.235	high	0.6533	ambiguous
Q99814	EPAS1_HUMAN	R260I	260	R	I	3.235	medium	0.6541	ambiguous
Q04771	ACVR1_HUMAN	E287K	287	E	K	1.665	low	0.655667	ambiguous
Q9UHY7	ENOPH_HUMAN	G178C	178	G	C	3.265	medium	0.656233	ambiguous
Q9BUI4	RPC3_HUMAN	G114D	114	G	D	2.64	medium	0.659833	ambiguous
Q9NTM9	CUTC_HUMAN	V169L	169	V	L	1.665	low	0.6602	ambiguous
O60462	NRP2_HUMAN	G132V	132	G	V	3.335	medium	0.660867	ambiguous
P49773	HINT1_HUMAN	G20E	20	G	E	1.465	low	0.6654	ambiguous
Q7L5Y1	ENOF1_HUMAN	D256Y	256	D	Y	3.95	high	0.6682	ambiguous
P30044	PRDX5_HUMAN	D166H	166	D	H	3.51	high	0.670067	ambiguous
P31751	AKT2_HUMAN	R208G	208	R	G	NA		0.676233	ambiguous
P63208	SKP1_HUMAN	L47V	47	L	V	1.81	low	0.679533	ambiguous
P61587	RND3_HUMAN	Y174D	174	Y	D	3.96	high	0.6823	ambiguous
Q9UBT2	SAE2_HUMAN	D250Y	250	D	Y	2.54	medium	0.682933	ambiguous
P54652	HSP72_HUMAN	G341V	341	G	V	5.515	high	0.687433	ambiguous
P21673	SAT1_HUMAN	V96M	96	V	M	3.65	high	0.687933	ambiguous
P14598	NCF1_HUMAN	H51Q	51	H	Q	1.6	low	0.687933	ambiguous
P07203	GPX1_HUMAN	P77R	77	P	R	3.385	medium	0.6894	ambiguous
P33681	CD80_HUMAN	C50R	50	C	R	3.085	medium	0.690633	ambiguous
P80098	CCL7_HUMAN	Y51N	51	Y	N	NA		0.691433	ambiguous
Q9UBC3	DNM3B_HUMAN	W260S	260	W	S	2.135	medium	0.692167	ambiguous
P34130	NTF4_HUMAN	D183N	183	D	N	1.675	low	0.693767	ambiguous
Q01968	OCRL_HUMAN	W614C	614	W	C	3.085	medium	0.694367	ambiguous
P98170	XIAP_HUMAN	R84S	84	R	S	2.105	medium	0.695033	ambiguous
Q9HBH1	DEFM_HUMAN	W207G	207	W	G	3.1	medium	0.695333	ambiguous
P68871	HBB_HUMAN	H144Q	144	H	Q	1.935	medium	0.6959	ambiguous
Q9GZS3	WDR61_HUMAN	W24C	24	W	C	3.155	medium	0.696467	ambiguous
Q13153	PAK1_HUMAN	Y334D	334	Y	D	1.945	medium	0.700133	ambiguous
Q15848	ADIPO_HUMAN	K172N	172	K	N	2.32	medium	0.701733	ambiguous
Q9Y6W6	DUS10_HUMAN	A434P	434	A	P	4.67	high	0.703533	ambiguous
P45974	UBP5_HUMAN	W197C	197	W	C	3.005	medium	0.703933	ambiguous
Q9UBU9	NXF1_HUMAN	A340T	340	A	T	1.41	low	0.704867	ambiguous
P03952	KLKB1_HUMAN	W620C	620	W	C	4.19	high	0.7057	ambiguous
Q13255	GRM1_HUMAN	P206S	206	P	S	2.745	medium	0.7071	ambiguous
Q9H0R8	GBRL1_HUMAN	D102Y	102	D	Y	NA		0.7076	ambiguous
P00488	F13A_HUMAN	H460N	460	H	N	2.215	medium	0.708833	ambiguous
O14544	SOCS6_HUMAN	G387E	387	G	E	2.8	medium	0.709833	ambiguous
P52848	NDST1_HUMAN	N856I	856	N	I	3.38	medium	0.7128	ambiguous
P14210	HGF_HUMAN	S135I	135	S	I	2.86	medium	0.714767	ambiguous
P22680	CP7A1_HUMAN	H395N	395	H	N	2.57	medium	0.723167	ambiguous
P59666	DEF3_HUMAN	W90C	90	W	C	NA		0.724733	ambiguous
P37268	FDFT_HUMAN	R185H	185	R	H	1.175	low	0.726467	ambiguous
P52732	KIF11_HUMAN	P131L	131	P	L	2.255	medium	0.731267	ambiguous
Q96PU4	UHRF2_HUMAN	G485W	485	G	W	3.565	high	0.731467	ambiguous
Q13569	TDG_HUMAN	G231E	231	G	E	3.74	high	0.735333	ambiguous
O43488	ARK72_HUMAN	F251S	251	F	S	2.63	medium	0.735567	ambiguous
P29474	NOS3_HUMAN	C441S	441	C	S	3.345	medium	0.736267	ambiguous
P69891	HBG1_HUMAN	V114D	114	V	D	NA		0.753633	ambiguous
P12724	ECP_HUMAN	A35D	35	A	D	2.96	medium	0.754	ambiguous
P01574	IFNB_HUMAN	L123P	123	L	P	2.87	medium	0.758467	ambiguous
Q16696	CP2AD_HUMAN	G100R	100	G	R	2.835	medium	0.7639	ambiguous
P51659	DHB4_HUMAN	V95F	95	V	F	1.375	low	0.7671	ambiguous
P37231	PPARG_HUMAN	E488K	488	E	K	2.38	medium	0.7764	ambiguous
O15119	TBX3_HUMAN	D154Y	154	D	Y	4.285	high	0.780767	carcinogenic
P00966	ASSY_HUMAN	D85Y	85	D	Y	3.075	medium	0.783267	carcinogenic
P21583	SCF_HUMAN	C114W	114	C	W	2.045	medium	0.7877	carcinogenic
O15520	FGF10_HUMAN	R80G	80	R	G	2.435	medium	0.787833	carcinogenic
P61812	TGFB2_HUMAN	C318Y	318	C	Y	3.73	high	0.788867	carcinogenic
Q969J5	I22R2_HUMAN	Y199N	199	Y	N	2.215	medium	0.792467	carcinogenic
P11217	PYGM_HUMAN	Y733C	733	Y	C	3.68	high	0.7996	carcinogenic
P11766	ADHX_HUMAN	D87Y	87	D	Y	4.705	high	0.799733	carcinogenic
P18031	PTN1_HUMAN	G220D	220	G	D	4.38	high	0.809367	carcinogenic
Q9Y2R2	PTN22_HUMAN	Q268L	268	Q	L	3.58	high	0.815433	carcinogenic
Q9HBA0	TRPV4_HUMAN	A293D	293	A	D	3.81	high	0.821733	carcinogenic
P09012	SNRPA_HUMAN	S64I	64	S	I	2.685	medium	0.823067	carcinogenic
P12004	PCNA_HUMAN	S228N	228	S	N	2.79	medium	0.8547	carcinogenic
P08253	MMP2_HUMAN	Y425N	425	Y	N	2.245	medium	0.857433	carcinogenic
P23677	IP3KA_HUMAN	L222R	222	L	R	2.46	medium	0.883667	carcinogenic
P15056	BRAF_HUMAN	L514P	514	L	P	2.38	medium	0.961167	carcinogenic
